# Supplementary material for: Synthesis of Cu–Mo/TiO2 and Co–Mo/TiO2 photocatalysts for the efficient degradation of organic pollutants in water
Source: publisher site journal article supplement (doi:10.3762/bjnano.17.37), 2026-04-27
Supplement: Additional file 1 [file 2190-4286-17-37-S1.pdf]

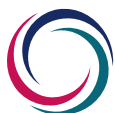

## Supporting Information

for

### **Synthesis of Cu–Mo/TiO<sub>2</sub> and Co–Mo/TiO<sub>2</sub> photocatalysts for the efficient degradation of organic pollutants in water**

Ilse Acosta, Brenda Zermeño, Edgar Moctezuma, Luis F. Garay-Rodríguez  
and Isaías Juárez-Ramírez

*Beilstein J. Nanotechnol.* **2026**, *17*, 559–570. [doi:10.3762/bjnano.17.37](https://doi.org/10.3762/bjnano.17.37)

## Additional XPS spectra

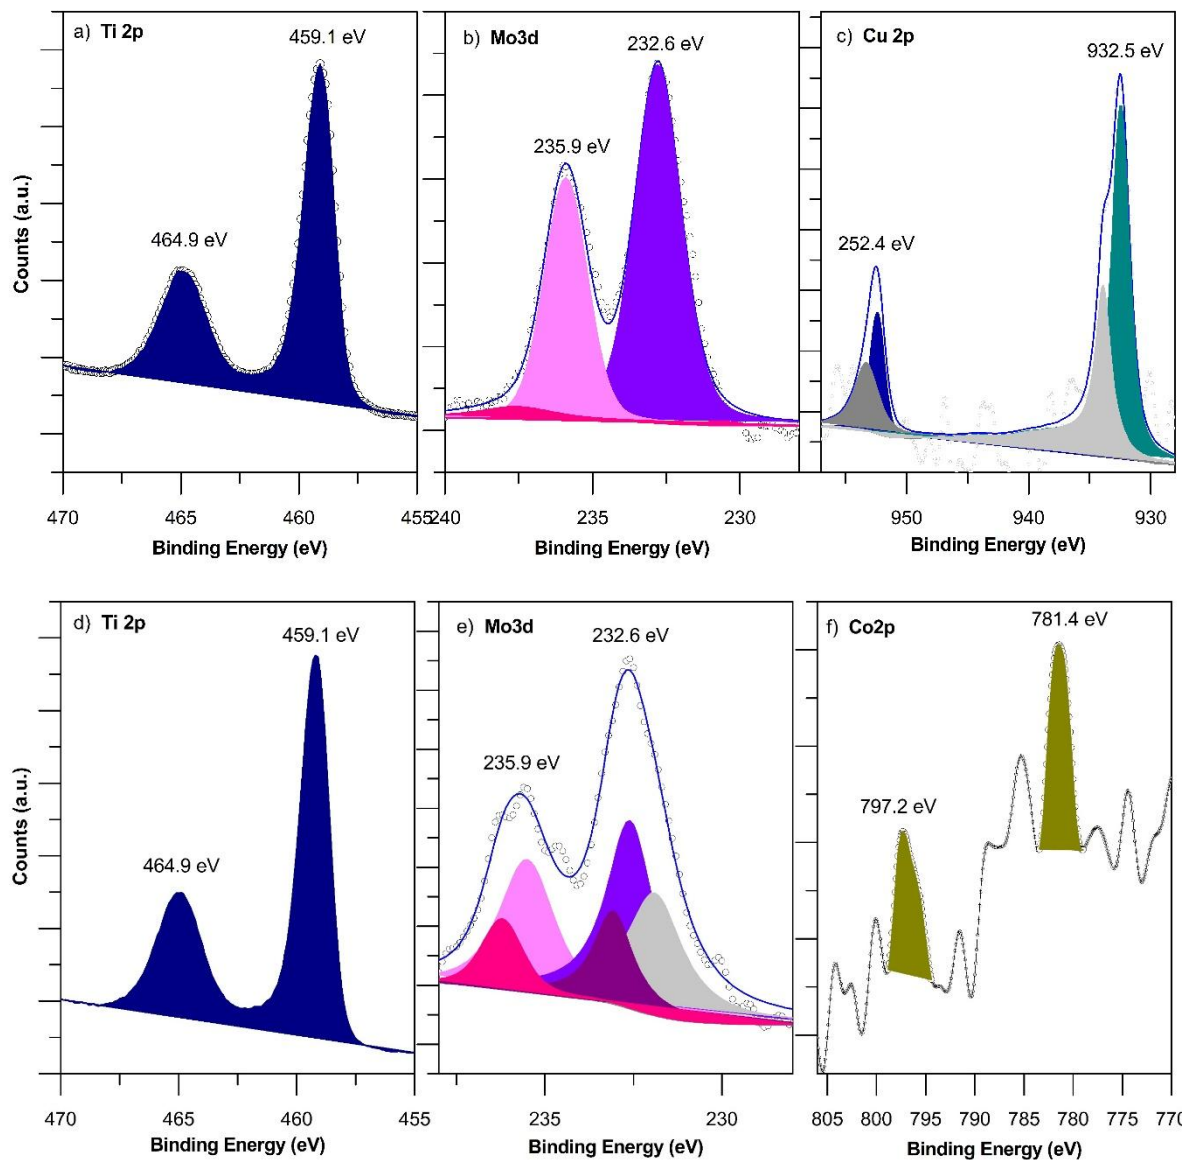

**Figure S1:** XPS spectra of a) Ti 2p spectrum of Cu–Mo/TiO<sub>2</sub>, b) Mo 3d spectrum of Cu–Mo/TiO<sub>2</sub>, c) Cu 2p spectrum of Cu–Mo/TiO<sub>2</sub>, d) Ti 2p spectrum of Co–Mo/TiO<sub>2</sub>, e) Mo 3d spectrum of Co–Mo/TiO<sub>2</sub>, and f) Co 2p spectrum of Cu–Mo/TiO<sub>2</sub>.
