# Supplementary material for: Synthesis of Cu–Mo/TiO2 and Co–Mo/TiO2 photocatalysts for the efficient degradation of organic pollutants in water
Source: publisher site journal article supplement (doi:10.3762/bjnano.17.37), 2026-04-27
Supplement: Additional file 2 [file 2190-4286-17-37-S2.pdf]

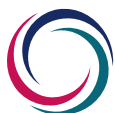

## Supporting Information

for

### **Synthesis of Cu–Mo/TiO<sub>2</sub> and Co–Mo/TiO<sub>2</sub> photocatalysts for the efficient degradation of organic pollutants in water**

Ilse Acosta, Brenda Zermeño, Edgar Moctezuma, Luis F. Garay-Rodríguez  
and Isaías Juárez-Ramírez

*Beilstein J. Nanotechnol.* **2026**, *17*, 559–570. [doi:10.3762/bjnano.17.37](https://doi.org/10.3762/bjnano.17.37)

## Statistical analysis of reaction experiments

SD evaluated for the HPLC equipment and SD for photocatalytic experiments.

**Table S1:** Standard deviation evaluated for the HPLC equipment.

| <b>Standard</b> | <b>Area</b> | <b>tr</b>  |
|-----------------|-------------|------------|
| 1               | 1133571     | 6.07       |
| 2               | 1137489     | 6.063      |
| 3               | 1117077     | 6.062      |
| 4               | 1130503     | 6.067      |
| 5               | 1135163     | 6.06       |
|                 |             |            |
| Average         | 1130760.6   | 6.0644     |
| Deviation       | 8060.05749  | 0.00403733 |
|                 |             |            |
| SD              | 0.71279964  | 0.0665742  |

**Table S2:** Average SD obtained for the photocatalytic experiments evaluated by the TOC equipment.<sup>a</sup>

| <b>Photocatalyst</b>           | <b>Mineralization (%)</b> | <b>SD</b> |
|--------------------------------|---------------------------|-----------|
| TiO <sub>2</sub>               | 49                        | 0.083     |
| 0.2 Cu–0.5 Mo/TiO <sub>2</sub> | 90                        | 0.16      |
| 0.5 Cu–0.5 Mo/TiO <sub>2</sub> | 18                        | 0.10      |
| 0.2 Co–0.5 Mo/TiO <sub>2</sub> | 79                        | 0.113     |
| 0.5 Co–0.5 Mo/TiO <sub>2</sub> | 70                        | 0.19      |

<sup>a</sup>The reaction experiments were carried out in duplicates and the analysis of reaction samples was carried out in triplicate.
